# Supplementary material for: Body Composition of Male Professional Soccer Players Using Different Measurement Methods: A Systematic Review and Meta-Analysis
Source: MDPI journal article supplement (doi:10.3390/nu15051160), 2023-02-25
Supplement: s1 [file s1]

Table S1

| Authors and years         | Sample size (n)  | Time of the SEA                    | Age (years) | Height (cm)  | Weight (kg)  | Sum of skinfold (mm)    | Fat mass (%)              | Fat mass (kg) | Muscle mass (%)         | Muscle mass (kg) | Fat-free mass (kg) | Endomorphy  | Ectomorphy  | Mesomorphy |
|---------------------------|------------------|------------------------------------|-------------|--------------|--------------|-------------------------|---------------------------|---------------|-------------------------|------------------|--------------------|-------------|-------------|------------|
| Al-Hazzaa et al., 2001    | Total (23)       | Preparation for the World cup      | 25.2 ± 3.3  | 177.2 ± 5.9  | 73.1 ± 6.8   | 14.2 ± 2.6 <sup>2</sup> | 12.3 ± 2.7 <sup>1,2</sup> | -             | -                       | -                | -                  | -           | -           | -          |
| Casajús, 2001             | Total (15)       | 1st measurement                    | 25.8 ± 3.1  | 180 ± 7      | 78.6 ± 6.6   | 57.0 ± 8.6 <sup>6</sup> | 8.6 ± 0.91 <sup>c</sup>   | -             | -                       | -                | 71.9 ± 6.0         | 2.6 ± 0.5   | 2.3 ± 0.7   | 4.9 ± 0.8  |
|                           |                  | 2nd measurement                    | 26.3 ± 3.1  | 180 ± 8      | 78.5 ± 6.4   | 52.9 ± 8.6 <sup>6</sup> | 8.2 ± 0.91 <sup>c</sup>   | -             | -                       | -                | 72.1 ± 5.7         | 2.4 ± 0.5   | 2.3 ± 0.7   | 4.8 ± 0.8  |
| Filaire et al., 2003      | Total (20)       | Start of pre-SEA                   | 25.1 ± 0.4  | 181.5 ± 1.4  | 78.3 ± 1.5   | -                       | 12.3 ± 0.9 <sup>D</sup>   | -             | -                       | -                | -                  | -           | -           | -          |
| Ostojic, 2003             | Total (30)       | Start pre-SEA                      | 23.5 ± 3.1  | 182.8 ± 6.0  | 77.8 ± 6.3   | -                       | 11.5 ± 2.1 <sup>D</sup>   | -             | -                       | -                | 68.8 ± 5.3         | -           | -           | -          |
| Gutierrez & Monroy, 2005  | Total (20)       | Preparation for the World cup      | 29.0 ± 3.0  | 175.0 ± 5.6  | 74.0 ± 5.6   | -                       | 10.0 ± 1.6 <sup>7b</sup>  | -             | 49.0 ± 1.3 <sup>M</sup> | -                | -                  | 2.35 ± 0.48 | 1.95 ± 0.77 | 5.9 ± 0.9  |
| Voutselas et al., 2007    | Total (72)       | -                                  | 20.1 ± 5.2  | 173.4 ± 22.0 | 70.2 ± 12.3  | -                       | 8.5 ± 4.6 <sup>D</sup>    | -             | -                       | -                | -                  | -           | -           | -          |
| Sotiropoulos et al., 2009 | Total (58)       | Beginning of the transition period | 24.4 ± 2.9  | 178.6 ± 4.1  | 77.57 ± 4.21 | -                       | 7.87 ± 1.70 <sup>D</sup>  | -             | -                       | -                | -                  | -           | -           | -          |
| Sporis et al., 2009       | Total (270)      | 2 consecutive pre-SEAs             | 28.3 ± 5.9  | 181.4 ± 2.5  | 78.4 ± 3.1   | -                       | 11.9 ± 3.1 <sup>D</sup>   | -             | -                       | -                | -                  | -           | -           | -          |
| Carling & Orhant, 2010    | Total (26)       | Start of pre-SEA                   | 24.4 ± 4.1  | 182.1 ± 5.8  | 77.48 ± 6.04 | -                       | 10.81 ± 1.77 <sup>D</sup> | -             | -                       | -                | 69.11 ± 5.43       | -           | -           | -          |
| Dey et al., 2010          | Total (150)      | -                                  | 23.3 ± 3.5  | -            | -            | -                       | -                         | -             | -                       | -                | -                  | -           | -           | -          |
|                           | Defenders (44)   |                                    | 23.1 ± 3.2  | 170.8 ± 5.7  | 63.2 ± 8.0   | -                       | 13.8 ± 2.0 <sup>D</sup>   | -             | -                       | -                | -                  | -           | -           | -          |
|                           | Midfielders (48) |                                    | 23.3 ± 3.6  | 171.9 ± 5.9  | 64.9 ± 6.5   | -                       | 13.3 ± 2.4 <sup>D</sup>   | -             | -                       | -                | -                  | -           | -           | -          |
|                           | Forwards (35)    |                                    | 23.2 ± 3.4  | 170.9 ± 5.7  | 63.5 ± 6.3   | -                       | 13.6 ± 2.1 <sup>D</sup>   | -             | -                       | -                | -                  | -           | -           | -          |
|                           | Goalkeepers (23) |                                    | 23.3 ± 3.9  | 173.8 ± 5.3  | 66.7 ± 5.5   | -                       | 14.0 ± 2.6 <sup>D</sup>   | -             | -                       | -                | -                  | -           | -           | -          |

|                               |                            |                                                        |            |             |              |                            |                           |             |                           |              |   |             |             |             |
|-------------------------------|----------------------------|--------------------------------------------------------|------------|-------------|--------------|----------------------------|---------------------------|-------------|---------------------------|--------------|---|-------------|-------------|-------------|
| Hazir, 2010                   | Total (305)                | 5 beginnings of the transition period for the SEA half | -          | -           | -            | -                          | -                         | -           | -                         | -            | - | -           | -           | -           |
|                               | (161 SL)                   |                                                        | 25.7 ± 3.7 | 178.4 ± 5.6 | 76.1 ± 6.1   | -                          | -                         | -           | -                         | -            | - | 2.5 ± 0.7   | 2.3 ± 0.7   | 4.8 ± 0.9   |
|                               | (144 FL)                   |                                                        | 24.1 ± 4.2 | 178.4 ± 5.9 | 73.9 ± 6.3   | -                          | -                         | -           | -                         | -            | - | 3.0 ± 0.9   | 2.6 ± 0.8   | 4.5 ± 0.9   |
| Kalapothar akos et al., 2011  | Total (12)                 | Start of pre-SEA                                       | 25 ± 5     | 179 ± 6     | 74.2 ± 6.5   | -                          | 10.5 ± 2.5 <sup>B</sup>   | -           | -                         | -            | - | -           | -           | -           |
| Boone et al., 2012            | Total (289)                | Pre-SEA                                                | 25.4 ± 4.9 | 182.4 ± 6.0 | 77.4 ± 7.1   | -                          | 11.0 ± 2.5 <sup>P</sup>   | -           | -                         | -            | - | -           | -           | -           |
| Chaouachi et al., 2012        | Total (23)                 | End of SEA                                             | 19 ± 1     | 181.0 ± 5.7 | 73.2 ± 4.1   | -                          | 11.0 ± 2.4 <sup>D</sup>   | -           | -                         | -            | - | -           | -           | -           |
| Owen et al., 2012             | Total (15)                 | 1st measurement                                        | 24.5 ± 3.4 | 181.1 ± 5.7 | 78.7 ± 7.6   | 60.23 ± 16.21 <sup>8</sup> | -                         | -           | -                         | -            | - | -           | -           | -           |
|                               |                            | 2nd measurement                                        |            |             |              | 59.23 ± 14.78 <sup>8</sup> |                           |             |                           |              |   |             |             |             |
| Henríquez-Olguín et al., 2013 | Total (100)                | 2 consecutive start of SEA                             | 23.0 ± 4.4 | -           | -            | -                          | -                         | -           | -                         | -            | - | -           | -           | -           |
|                               | Central defenders (17)     |                                                        | 24.8 ± 4.0 | 181.4 ± 4.2 | 78.2 ± 4.5   | -                          | -                         | -           | -                         | -            | - | 2.23 ± 0.74 | 2.48 ± 0.57 | 5.29 ± 0.68 |
|                               | Lateral defenders (14)     |                                                        | 23.2 ± 2.6 | 174.6 ± 5.7 | 73.0 ± 5.7   | -                          | -                         | -           | -                         | -            | - | 2.27 ± 0.49 | 2.01 ± 0.52 | 5.52 ± 0.99 |
|                               | Defensive midfielders (18) |                                                        | 23.8 ± 4.9 | 175.6 ± 5.8 | 71.6 ± 6.0   | -                          | -                         | -           | -                         | -            | - | 2.16 ± 0.59 | 2.42 ± 0.83 | 5.14 ± 0.93 |
|                               | Offensive midfielders (17) |                                                        | 23.3 ± 3.8 | 172.4 ± 5.2 | 72.2 ± 5.4   | -                          | -                         | -           | -                         | -            | - | 2.36 ± 0.67 | 1.76 ± 0.71 | 5.51 ± 1.07 |
|                               | Forwards (23)              |                                                        | 23.2 ± 4.5 | 177.1 ± 5.4 | 73.7 ± 7.1   | -                          | -                         | -           | -                         | -            | - | 2.14 ± 0.67 | 2.39 ± 0.70 | 5.12 ± 0.79 |
|                               | Goalkeepers (11)           |                                                        | 23.0 ± 4.4 | 184.0 ± 2.8 | 81.3 ± 0.5   | -                          | -                         | -           | -                         | -            | - | 2.35 ± 0.79 | 2.53 ± 0.51 | 5.31 ± 0.85 |
| Jorquera et al., 2013         | Total (406)                | -                                                      | -          | -           | -            | -                          | -                         | -           | -                         | -            | - | -           | -           | -           |
|                               | Defenders (124)            |                                                        | 25.3 ± 4.8 | 178.1 ± 5.5 | 77.1 ± 6.2   | 51.3 ± 13.6 <sup>6</sup>   | -                         | -           | -                         | -            | - | 2.25        | 2.10        | 5.40        |
|                               | Midfielders (134)          |                                                        | 25.2 ± 4.7 | 172.9 ± 5.6 | 71.7 ± 6.0   | 50.5 ± 11.6 <sup>6</sup>   | -                         | -           | -                         | -            | - | 2.20        | 1.94        | 5.51        |
|                               | Forwards (93)              |                                                        | 23.5 ± 4.1 | 176.6 ± 6.1 | 75.2 ± 7.2   | 48.8 ± 11.5 <sup>6</sup>   | -                         | -           | -                         | -            | - | 2.13        | 2.10        | 5.32        |
|                               | Goalkeepers (48)           |                                                        | 25.1 ± 5.5 | 181.2 ± 3.8 | 81.4 ± 5.9   | 58.9 ± 12.0 <sup>6</sup>   | -                         | -           | -                         | -            | - | 2.53        | 2.05        | 5.49        |
| Lago-Peñas et al., 2013       | Total (42)                 | Start of pre-SEA                                       | 25.0 ± 5.2 | 177.3 ± 6.7 | 75.72 ± 6.37 | 47.45 ± 7.70 <sup>6</sup>  | 10.99 ± 1.02 <sup>F</sup> | 8.34 ± 1.27 | 47.96 ± 0.87 <sup>M</sup> | 36.33 ± 3.12 | - | -           | -           | -           |

|                           |               |                  |                    |               |              |                                                                                                           |                                                                                                                                             |   |   |   |              |             |             |             |
|---------------------------|---------------|------------------|--------------------|---------------|--------------|-----------------------------------------------------------------------------------------------------------|---------------------------------------------------------------------------------------------------------------------------------------------|---|---|---|--------------|-------------|-------------|-------------|
| Orhan et al., 2013        | 1st team (24) | -                | 23.29 ± 2.12       | 179.28 ± 5.71 | 76.86 ± 5.39 | -                                                                                                         | -                                                                                                                                           | - | - | - | -            | 2.28 ± 0.41 | 2.31 ± 0.64 | 4.40 ± 1.05 |
|                           | 2nd team (24) |                  | 25.12 ± 3.60       | 179.08 ± 5.73 | 76.60 ± 6.56 | -                                                                                                         | -                                                                                                                                           | - | - | - | -            | 2.34 ± 0.44 | 2.30 ± 0.61 | 4.35 ± 0.93 |
| Iga et al., 2014          | Total (35)    | Start of pre-SEA | 20 ± 4             | 182 ± 6       | 77.1 ± 7.3   | 26.9 ± 4.3 <sup>D</sup><br>32.4 ± 7.5 <sup>R</sup><br>35.6 ± 6.1 <sup>S</sup><br>57.5 ± 11.3 <sup>8</sup> | 12.2 ± 1.9 <sup>D</sup><br>10.0 ± 1.1 <sup>R</sup>                                                                                          | - | - | - | -            | -           | -           | -           |
| Michailidis, 2014         | Total (15)    | Start of pre-SEA | -                  | -             | 76.70 ± 1.82 | -                                                                                                         | 10.32 ± 0.73 <sup>D</sup>                                                                                                                   | - | - | - | 68.76 ± 1.65 | -           | -           | -           |
| Novack et al., 2014       | Total (31)    | -                | 21.48 ± 3.38       | 181.97 ± 8.11 | 79.05 ± 9.48 | -                                                                                                         | 15.09 ± 3.47 <sup>D</sup><br>8.38 ± 2.80 <sup>D</sup><br>8.05 ± 3.02 <sup>B</sup><br>7.48 ± 1.01 <sup>L1</sup><br>10.49 ± 2.46 <sup>W</sup> | - | - | - | -            | -           | -           | -           |
| Mascherini et al., 2015   | Total (59)    | Start of pre-SEA | 22.47 ± 5.58       | 181 ± 8       | 76.48 ± 8.35 | 56.17 ± 12.25 <sup>8b</sup>                                                                               | -                                                                                                                                           | - | - | - | -            | -           | -           | -           |
| Najafi et al., 2015       | Total (60)    | -                | 24.31 ± 4.20       | 179 ± 6       | 75.40 ± 7.14 | -                                                                                                         | 11.08 ± 1.50 <sup>F</sup>                                                                                                                   | - | - | - | -            | -           | -           | -           |
| Bekris et al., 2016       | Total (24)    | Start of pre-SEA | 24.3 ± 4.3         | 180.3 ± 3.8   | 77.44 ± 6.13 | -                                                                                                         | 10.33 ± 1.59 <sup>D</sup>                                                                                                                   | - | - | - | -            | -           | -           | -           |
| Fessi et al., 2016        | Total (17)    | Start of pre-SEA | 23.7 ± 3.2         | 177.9 ± 6.0   | 72.9 ± 8.4   | -                                                                                                         | 10.4 ± 1.9 <sup>D</sup>                                                                                                                     | - | - | - | -            | -           | -           | -           |
| Petri et al., 2016        | Total (28)    | Start of pre-SEA | 27.88 ± 4.55       | 184 ± 6       | 79.9 ± 6.2   | -                                                                                                         | -                                                                                                                                           | - | - | - | 72.5 ± 5.1   | -           | -           | -           |
| Lopez-Taylor et al., 2018 | Total (131)   | -                | 23.2 (20.5 – 26.8) | 177.5 ± 5.8   | 73.2 ± 8.0   | -                                                                                                         | 9.2 (6.3–12.0) <sup>F</sup><br>9.4 (7.4–11.3) <sup>Wh</sup><br>10.2 (7.2–13.3) <sup>S</sup><br>10.5 (8.6–13.1) <sup>W</sup>                 | - | - | - | -            | -           | -           | -           |

|                                  |                      |                  |                          |                           |                          |                            |                                                                                                                                                                                                                                                                                                                                          |              |                           |              |              |                         |                         |                         |
|----------------------------------|----------------------|------------------|--------------------------|---------------------------|--------------------------|----------------------------|------------------------------------------------------------------------------------------------------------------------------------------------------------------------------------------------------------------------------------------------------------------------------------------------------------------------------------------|--------------|---------------------------|--------------|--------------|-------------------------|-------------------------|-------------------------|
|                                  |                      |                  |                          |                           |                          |                            | 10.5 (8.9–12.7) <sup>E</sup><br>10.5 (9.3–12.2) <sup>Pa</sup><br>10.7 (9.6–12.2) <sup>R</sup><br>10.8 (7.8–14.4) <sup>Tb</sup><br>11.2 (9.4–13.5) <sup>Eb</sup><br>12.6 (10.5–14.5) <sup>Cl</sup><br>13.0 (9.6–17.9) <sup>Fo4</sup><br>13.1 (11.0–15.5) <sup>O</sup><br>13.7 (10.1–18.4) <sup>Fo2</sup><br>14.3 (12.5–17.6) <sup>Z</sup> |              |                           |              |              |                         |                         |                         |
| Owen et al., 2018                | Total (22)           | Start of pre-SEA | 24.0 ± 3.7               | 180.45 ± 5.12             | 76.66 ± 5.34             | 63.51 ± 11.87 <sup>a</sup> | -                                                                                                                                                                                                                                                                                                                                        | 7.47 ± 1.78  | -                         | -            | 67.21 ± 5.31 | -                       | -                       | -                       |
| Zuñiga et al., 2018              | Total (78)           | Pre-SEA          | -                        | -                         | -                        | -                          | -                                                                                                                                                                                                                                                                                                                                        | -            | -                         | -            | -            | -                       | -                       | -                       |
|                                  | 1ª división (18)     |                  | 25.8 ± 5.2               | 175.1 ± 5.6               | 75.1 ± 7.2               | -                          | -                                                                                                                                                                                                                                                                                                                                        | -            | -                         | -            | -            | 2.3 ± 0.8               | 1.9 ± 1.0               | 5.7 ± 1.1               |
|                                  | 1ª “a” división (19) |                  | 23.4 ± 1.6               | 175.0 ± 4.8               | 72.9 ± 4.4               | -                          | -                                                                                                                                                                                                                                                                                                                                        | -            | -                         | -            | -            | 2.5 ± 0.6               | 2.1 ± 0.6               | 5.3 ± 0.7               |
|                                  | 2ª división (24)     |                  | 18.9 ± 1.6               | 175.0 ± 5.6               | 75.1 ± 7.2               | -                          | -                                                                                                                                                                                                                                                                                                                                        | -            | -                         | -            | -            | 2.6 ± 1.0               | 3.1 ± 1.0               | 4.3 ± 0.8               |
|                                  | 3ª división (17)     |                  | 16.0 ± 0.9               | 169.4 ± 4.0               | 60.9 ± 6.8               | -                          | -                                                                                                                                                                                                                                                                                                                                        | -            | -                         | -            | -            | 2.3 ± 0.8               | 3.1 ± 1.3               | 4.4 ± 1.4               |
| Pireva, 2019                     | Total (118)          | -                | -                        | 180.78 ± 6.06             | 77.91 ± 6.63             | -                          | 14.43 ± 1.42 <sup>M</sup>                                                                                                                                                                                                                                                                                                                | 10.92 ± 3.24 | 54.62 ± 3.38 <sup>M</sup> | 42.62 ± 5.03 | 66.65 ± 5.52 | 2.4 ± 0.7               | 2.4 ± 0.7               | 5.4 ± 1.0               |
| Rodríguez-Rodríguez et al., 2019 | Total (339)          | -                | -                        | -                         | -                        | -                          | -                                                                                                                                                                                                                                                                                                                                        | -            | -                         | -            | -            | -                       | -                       | -                       |
|                                  | Defenders (119)      |                  | 25.3 ± 4.8               | 178.2 ± 5.6               | 77.1 ± 6.2               | 51.4 ± 13.7 <sup>6</sup>   | -                                                                                                                                                                                                                                                                                                                                        | 16.2 ± 2.6   | -                         | 38.9 ± 3.6   | -            | 2.3 ± 0.7               | 2.1 ± 0.7               | 5.4 ± 0.9               |
|                                  | Midfielders (133)    |                  | 25.2 ± 4.8               | 172.9 ± 5.6               | 71.7 ± 6.0               | 50.6 ± 11.6 <sup>6</sup>   | -                                                                                                                                                                                                                                                                                                                                        | 15.0 ± 2.0   | -                         | 35.8 ± 3.6   | -            | 2.3 ± 0.6               | 1.9 ± 0.8               | 5.5 ± 1.0               |
|                                  | Forwards (94)        |                  | 23.5 ± 4.1               | 176.6 ± 6.2               | 75.2 ± 7.2               | 48.8 ± 11.5 <sup>6</sup>   | -                                                                                                                                                                                                                                                                                                                                        | 15.5 ± 2.4   | -                         | 37.8 ± 5.1   | -            | 2.1 ± 0.6               | 2.1 ± 0.7               | 5.3 ± 1.1               |
|                                  | Goalkeepers (44)     |                  | 25.1 ± 5.5               | 181.3 ± 3.8               | 81.4 ± 5.9               | 58.9 ± 12.0 <sup>6</sup>   | -                                                                                                                                                                                                                                                                                                                                        | 18.0 ± 2.1   | -                         | 40.7 ± 4.1   | -            | 2.5 ± 0.5               | 2.1 ± 0.7               | 5.5 ± 0.9               |
| Campa et al., 2020               | Total (176)          | -                | 27.4 ± 4.3 <sup>GD</sup> | 183.8 ± 0.5 <sup>GD</sup> | 79.5 ± 6.1 <sup>GD</sup> | -                          | -                                                                                                                                                                                                                                                                                                                                        | -            | -                         | -            | -            | 2.0 ± 0.4 <sup>GD</sup> | 2.7 ± 0.6 <sup>GD</sup> | 4.9 ± 0.8 <sup>GD</sup> |
|                                  |                      |                  | 28.0 ± 5.0 <sup>GV</sup> | 182.9 ± 0.5 <sup>GV</sup> | 78.9 ± 6.5 <sup>GV</sup> | -                          | -                                                                                                                                                                                                                                                                                                                                        | -            | -                         | -            | -            | 1.9 ± 0.4 <sup>GV</sup> | 2.7 ± 0.6 <sup>GV</sup> | 5.2 ± 0.8 <sup>GV</sup> |

|                             |                          |                        |            |             |              |   |                                                                                                                                                                                                        |              |                           |              |   |            |            |            |
|-----------------------------|--------------------------|------------------------|------------|-------------|--------------|---|--------------------------------------------------------------------------------------------------------------------------------------------------------------------------------------------------------|--------------|---------------------------|--------------|---|------------|------------|------------|
| Grazioli et al., 2020       | Total (23)               | Start of pre-SEA       | 26.3 ± 5.6 | -           | 78.43 ± 8.70 | - | 10.67 ± 1.71 <sup>F</sup>                                                                                                                                                                              | -            | -                         | -            | - | -          | -          | -          |
| Vega et al., 2020           | Total (41)               | 10 consecutive SEA     | -          | -           | -            | - | -                                                                                                                                                                                                      | -            | -                         | -            | - | -          | -          | -          |
|                             | Central defenders (5)    |                        | -          | 184 ± 3     | 79.46 ± 2.79 | - | 7.34 ± 1.13 <sup>Y</sup>                                                                                                                                                                               | -            | -                         | -            | - | -          | -          | -          |
|                             | Lateral defenders (10)   |                        | -          | 176 ± 4     | 71.63 ± 3.92 | - | 7.11 ± 0.94 <sup>Y</sup>                                                                                                                                                                               | -            | -                         | -            | - | -          | -          | -          |
|                             | Central midfielders (11) |                        | -          | 178 ± 5     | 73.77 ± 6.24 | - | 7.01 ± 0.65 <sup>Y</sup>                                                                                                                                                                               | -            | -                         | -            | - | -          | -          | -          |
|                             | Lateral midfielders (5)  |                        | -          | 179 ± 4     | 71.97 ± 3.19 | - | 7.07 ± 0.70 <sup>Y</sup>                                                                                                                                                                               | -            | -                         | -            | - | -          | -          | -          |
|                             | Forwards (7)             |                        | -          | 185 ± 5     | 78.82 ± 6.44 | - | 7.23 ± 1.32 <sup>Y</sup>                                                                                                                                                                               | -            | -                         | -            | - | -          | -          | -          |
|                             | Goalkeepers (3)          |                        | -          | 190 ± 2     | 84.03 ± 1.20 | - | 7.91 ± 0.83 <sup>Y</sup>                                                                                                                                                                               | -            | -                         | -            | - | -          | -          | -          |
| Pietraszewska et al., 2020  | Total (37)               | During competitive SEA | 19-30      | 181.6 ± 5.5 | 76.8 ± 7.2   | - | -                                                                                                                                                                                                      | -            | -                         | -            | - | -          | -          | -          |
| Castro Jiménez et al., 2021 | Total (24)               | -                      | 21.0 ± 1.9 | 177.3 ± 4.3 | 73.21 ± 6.42 | - | -                                                                                                                                                                                                      | -            | -                         | -            | - | -          | -          | -          |
|                             | Defenders (5)            |                        | -          | 181.7 ± 6.1 | 75.3 ± 8.3   | - | -                                                                                                                                                                                                      | -            | -                         | -            | - | 2.08 ± 0.8 | 2.78 ± 0.7 | 5.0 ± 0.3  |
|                             | Midfielders (13)         |                        | -          | 175 ± 4.6   | 69.7 ± 4.3   | - | -                                                                                                                                                                                                      | -            | -                         | -            | - | 2.13 ± 0.7 | 2.7 ± 0.7  | 5.3 ± 0.9  |
|                             | Forwards (4)             |                        | -          | 174.3 ± 4.0 | 76.4 ± 5.5   | - | -                                                                                                                                                                                                      | -            | -                         | -            | - | 2.3 ± 0.8  | 1.58 ± 0.5 | 6.8 ± 0.8  |
|                             | Goalkeepers (2)          |                        | -          | 185.2 ± 5.2 | 80.9 ± 0.8   | - | -                                                                                                                                                                                                      | -            | -                         | -            | - | 1.7 ± 0.6  | 2.8 ± 1.0  | 5.85 ± 1.1 |
| Kammerer López et al., 2021 | Total (79)               | During competitive SEA | 23.0 ± 4.4 | 178.4 ± 6.8 | 75.2 ± 7.7   | - | 7.20 ± 2.58 <sup>T</sup><br>7.84 ± 1.56 <sup>C</sup><br>10.04 ± 1.43 <sup>R</sup><br>11.82 ± 2.17 <sup>F</sup><br>11.93 ± 2.88 <sup>PB</sup><br>13.05 ± 3.63 <sup>D</sup><br>21.83 ± 3.14 <sup>K</sup> | 16.37 ± 2.61 | 49.27 ± 3.02 <sup>K</sup> | 37.10 ± 4.97 | - | -          | -          | -          |

C=Carter, 1982; Ci=Civar, 2003; D=Durnin y Womersley, 1974; E=Evans 3 pliegues, 2005; Eb=Evans 7 pliegues, 2005; F=Faulkner, 1968; Fo4=Forsyth 4 pliegues, 1973; Fo2=Forsyth 2 pliegues, 1973; GD=Development group; GV=Validation group; J7=Jackson y Pollock 7 pliegues, 1978; J7b=Jackson y Pollock 7 pliegues, 1985; J3=Jackson y Pollock 3 pliegues, 1978; K=Kerr, 1988; L1=Lohman, 1981; L2=Lohman, 1992; M=Matiegka, 1921; O=Oliver, 2012; P=Parizkova, 1977; PB=Pariskova y Buskova, 1971; Pa=Pascale, 1956; R=Reilly, 2009; S=Stewart, 2000; SEA=Season; T=Thorland 3 pliegues, 1984; Tb=Thorland 7 pliegues, 1984; W=Withers et al., 1987; Wh=White, 1980; Y=Yuhasz, 1974; Z=Zuti, 1973; 2=Sum of 2 skinfold (triceps and subscapular); 4D=Sum of 4 skinfold Durnin y Womersley, 1974 (triceps, subscapular, iliac crest and supraspinale); 4R=Sum of 4 skinfold Reilly, 2009 (triceps, abdominal, mid-thigh and calf); 5=Sum



|                             |                          |                           |                          |                           |                          |                          |                          |            |              |              |                          |            |
|-----------------------------|--------------------------|---------------------------|--------------------------|---------------------------|--------------------------|--------------------------|--------------------------|------------|--------------|--------------|--------------------------|------------|
|                             | Central defenders (18)   |                           | 27.3 ± 6.2               | 187.9 ± 4.9               | 84.5 ± 4.6               | 11.7 ± 2.8               | -                        | -          | -            | -            | -                        | -          |
|                             | Lateral defenders (15)   |                           | 26.7 ± 4.8               | 180.7 ± 3.6               | 76.5 ± 4.8               | 11.2 ± 2.4               | -                        | -          | -            | -            | -                        | -          |
|                             | Central midfielders (24) |                           | 25.8 ± 5.3               | 181.2 ± 5.8               | 75.8 ± 6.3               | 9.9 ± 2.9                | -                        | -          | -            | -            | -                        | -          |
|                             | Wingers (18)             |                           | 25.3 ± 4.2               | 177.6 ± 4.4               | 74.6 ± 5.1               | 10.3 ± 2.1               | -                        | -          | -            | -            | -                        | -          |
|                             | Forwards (34)            |                           | 24.0 ± 3.6               | 183.3 ± 7.2               | 79.4 ± 7.7               | 10.4 ± 3.1               | -                        | -          | -            | -            | -                        | -          |
|                             | Goalkeepers (11)         |                           | 26.6 ± 6.5               | 188.6 ± 3.3               | 87.0 ± 4.6               | 11.5 ± 3.1               | -                        | -          | -            | -            | -                        | -          |
| Aras et al., 2017           | Total (12)               | -                         | 18.33 ± 0.98             | 178.83 ± 4.57             | 71.68 ± 4.82             | 15.76 ± 3.51             | -                        | -          | -            | -            | -                        | -          |
| Requena et al., 2017        | Total (19)               | Start of pre-SEA          | 26.2 ± 2.8               | 180.3 ± 3.3               | 76.9 ± 6.3               | 11.6 ± 3.6               | -                        | -          | -            | -            | -                        | -          |
| Kafedžić et al., 2018       | Total (39)               | 2 start of pre-SEA        | 23.5 ± 4.6               | 182.0 ± 5.6               | 77.8 ± 5.8               | 10.3 ± 3.2               | -                        | 45.3 ± 2.8 | -            | -            | -                        | -          |
| Marcos et al., 2018         | Total (233)              | Start of pre-SEA          | 25.37 ± 5.06             | 178.92 ± 6.23             | 76.81 ± 7.17             | 12 ± 3                   | -                        | -          | -            | -            | -                        | -          |
| Suarez-Arrones et al., 2018 | Total (18)               | End of SEA                | 27.6 ± 3.0               | 183.9 ± 6.6               | 78.3 ± 4.5               | 9.5 ± 2.6                | -                        | -          | -            | -            | -                        | -          |
| Clemente et al., 2019       | Total (23)               | Start of pre-SEA          | 24.7 ± 2.8               | 179.2 ± 6.3               | 76.75 ± 5.56             | 14.04 ± 1.12             | -                        | -          | -            | 85.96 ± 1.12 | -                        | -          |
| Gardasevic et al., 2019     | Total (70)               | End of SEA                | 22.84 ± 4.47             | 182.67 ± 6.16             | 78.45 ± 7.60             | 10.00 ± 2.95             | -                        | -          | 39.89 ± 3.57 | -            | -                        | -          |
| Pietraszewska et al., 2019  | Total (29)               | During of competitive SEA | 25.6 ± 5.8               | 183.0 ± 6.0               | 76.7 ± 8.0               | 18.2 ± 3.0               | 14.0 ± 3.1               | 59.4 ± 3.1 | 45.5 ± 4.8   | 81.8 ± 3.0   | 62.7 ± 5.9               | -          |
| Campa et al., 2020          | Total (176)              | -                         | 27.4 ± 4.3 <sup>CD</sup> | 183.8 ± 0.5 <sup>CD</sup> | 79.5 ± 6.1 <sup>CD</sup> | 13.3 ± 1.9 <sup>CD</sup> | 10.6 ± 1.7 <sup>CD</sup> | -          | -            | -            | 68.8 ± 5.4 <sup>CD</sup> | -          |
|                             |                          |                           | 28.0 ± 5.0 <sup>CV</sup> | 182.9 ± 0.5 <sup>CV</sup> | 78.9 ± 6.5 <sup>CV</sup> | 12.9 ± 1.9 <sup>CV</sup> | 10.2 ± 1.9 <sup>CV</sup> | -          | -            | -            | 68.7 ± 5.7 <sup>CV</sup> | -          |
| Dağcılar & Öztürk, 2020     | Total (191)              | During of competitive SEA | 24.7 ± 5.5               | 177.8 ± 6.1               | 75.2 ± 8.1               | 9.1 ± 3.3                | -                        | -          | -            | -            | 68.2 ± 6.2               | 47.3 ± 3.0 |
| Gardasevic & Bjelica, 2020  | Total (53)               | End of SEA                | 22.75 ± 4.16             | 180.30 ± 5.56             | 75.18 ± 7.24             | 9.83 ± 3.18              | -                        | -          | 38.31 ± 3.15 | -            | -                        | -          |
| Granero-Gil et al., 2020    | Total (30)               | During of competitive SEA | 26.57 ± 5.56             | 182 ± 5                   | 77.20 ± 2.76             | 8.44 ± 1.08              | -                        | -          | -            | -            | -                        | -          |
| Książek et al., 2020        | Total (26)               | Pre-SEA                   | 27.0 ± 3.7               | 190 ± 1                   | 78.3 ± 6.9               | 19.5 ± 3.3               | 15.6 ± 3.1               | 58.8 ± 3.4 | 47.0 ± 4.8   | 80.4 ± 3.5   | 64.3 ± 6.4               | 47.2 ± 4.6 |
| Radzimiński et al., 2020    | Total (23)               | During of competitive SEA | 27.9 ± 4.58              | 181.7 ± 6.53              | 78.8 ± 7.35              | 9.6 ± 2.2                | -                        | -          | -            | -            | -                        | -          |
| Castro Jiménez et al., 2021 | Total (24)               | -                         | 21.0 ± 1.9               | 177.3 ± 4.3               | 73.21 ± 6.42             | -                        | -                        | -          | -            | -            | -                        | -          |
|                             | Defenders (5)            |                           | -                        | 181.7 ± 6.1               | 75.3 ± 8.3               | 13.0 ± 3.0               | -                        | -          | 37.4 ± 3.6   | -            | -                        | -          |

|  |                  |  |   |             |            |            |   |   |            |   |   |   |
|--|------------------|--|---|-------------|------------|------------|---|---|------------|---|---|---|
|  | Midfielders (13) |  | - | 175.0 ± 4.6 | 69.7 ± 4.3 | 14.4 ± 3.0 | - | - | 34.6 ± 3.7 | - | - | - |
|  | Forwards (4)     |  | - | 174.3 ± 4.0 | 76.4 ± 5.5 | 15.2 ± 4.3 | - | - | 37.0 ± 2.2 | - | - | - |
|  | Goalkeepers (2)  |  | - | 185.2 ± 5.2 | 80.9 ± 0.8 | 12.6 ± 5.7 | - | - | 40.5 ± 2.7 | - | - | - |

GD=Development group; GV=Validation group; SEA=Season

Table S3

| Authors and years           | Sample size (n) | Time of the SEA       | Age (years)           | Height (cm)   | Weight (kg)  | Fat mass (%)        | Fat mass (kg) | Fat-free mass (%) | Fat-free mass (kg) | Bone mineral density (g/cm³) | Bone mineral content (kg) |
|-----------------------------|-----------------|-----------------------|-----------------------|---------------|--------------|---------------------|---------------|-------------------|--------------------|------------------------------|---------------------------|
| Wittich et al., 2001        | Total (42)      | 3 consecutive pre-SEA | 23.2 ± 3.5            | 176.5 ± 4.5   | 76.2 ± 5.4   | 12.2 ± 3.1          | 9.2 ± 2.8     | 82.9 ± 3.1        | 63.1 ± 3.9         | -                            | -                         |
| Svantesson et al., 2008     | Total (17)      | Spring                | 24.1 ± 3.8            | 183.5 ± 6.4   | 80.6 ± 7.7   | 10.9 ± 3.5          | -             | -                 | 72.4 ± 6.2         | -                            | -                         |
| Reinke et al., 2009         | Total (10)      | End of SEA            | 25.3 ± 5.1            | 184.2 ± 5.9   | 90.1 ± 5.6   | 11.9 ± 6.2          | 10.3 ± 5.6    | -                 | 74.4 ± 4.2         | -                            | -                         |
| Sutton et al., 2009         | Total (64)      | -                     | 26.2 ± 4.0            | 182 ± 7       | 83.2 ± 7.5   | 10.6 ± 2.1          | -             | 81.3 ± 2.0        | -                  | 1.383 ± 0.100                | -                         |
| Gerosa-Neto et al., 2014    | Total (82)      | Pre-SEA               | 23.6 ± 4.2            | 179.9 ± 8.1   | 77.0 ± 12.8  | 14.0 ± 5.2          | 11.3 ± 5.1    | -                 | 61.9 ± 7.5         | 1.42 ± 0.84                  | -                         |
| Novack et al., 2014         | Total (31)      | -                     | 21.48 ± 3.38          | 181.97 ± 8.11 | 79.05 ± 9.48 | 13.68 ± 4.22        | 10.99 ± 4.06  | -                 | 68.05 ± 7.38       | -                            | -                         |
| Milanese et al., 2015       | Total (29)      | 3 consecutive SEA     | 27.5 ± 4.38           | 185.2 ± 5.85  | 82.0 ± 5.95  | 11.2 ± 2.26         | 8.56 ± 1.96   | -                 | 64.82 ± 4.85       | 1.219 ± 0.081                | 2.90 ± 0.32               |
| Milsom et al., 2015         | Total (27)      | 3 consecutive SEA     | 24.1 ± 3.9            | 182.5 ± 7.1   | 81.4 ± 8.2   | 10.0 ± 1.6          | 7.8 ± 1.6     | -                 | 66.9 ± 7.1         | -                            | -                         |
| Sánchez-Ureña et al., 2016  | Total (106)     | -                     | 24.53 ± 4.77          | 176.7 ± 6.5   | 75.45 ± 7.2  | 13.34 ± 4.1         | -             | -                 | 62.1 ± 5.5         | 1.34 ± 0.08                  | 3.6 ± 0.4                 |
| Devlin et al., 2017         | Total (18)      | End of pre-SEA        | 27 ± 5                | 180.4 ± 7.3   | 75.6 ± 5.6   | 12.8 ± 1.9          | 8.71 ± 1.43   | -                 | -                  | -                            | 2.71 ± 0.24               |
| Devlin et al., 2017b        | Total (18)      | Start of pre-SEA      | 25 ± 5                | 180.4 ± 7.4   | 68.53 ± 6.61 | 14.7 ± 3.0          | 10.07 ± 2.49  | -                 | -                  | -                            | 2.70 ± 0.24               |
| Lopez-Taylor et al., 2018   | Total (131)     | -                     | 23.2<br>(20.5 – 26.8) | 177.5 ± 5.8   | 73.2 ± 8.0   | 14.0<br>(11.9–16.4) | -             | -                 | -                  | -                            | -                         |
| Suarez-Arrones et al., 2018 | Total (18)      | End of SEA            | 27.6 ± 3.0            | 183.9 ± 6.6   | 78.3 ± 4.5   | 14.4 ± 1.3          | -             | -                 | -                  | -                            | -                         |

|                                |             |                        |            |             |              |              |              |              |              |   |             |
|--------------------------------|-------------|------------------------|------------|-------------|--------------|--------------|--------------|--------------|--------------|---|-------------|
| Khalladi et al., 2019          | Total (111) | During competitive SEA | 23.7 ± 4.8 | 176.9 ± 5.9 | 71.0 ± 9.9   | 20.6 ± 4.4   | -            | -            | 56.4 ± 6.4   | - | -           |
| Randell et al., 2019           | Total (16)  | 1st pre-SEA            | 25 ± 4     | 180.2 ± 7.1 | 74.3 ± 6.5   | 13.5 ± 1.8   | 10.7 ± 2.0   | -            | 60.9 ± 5.4   | - | -           |
|                                |             | 2nd pre-SEA            | 26 ± 4     | 180.2 ± 7.1 | 74.6 ± 6.0   | 13.6 ± 1.8   | 10.3 ± 1.5   | -            | 61.4 ± 5.1   | - | -           |
| Suarez-Arrones et al., 2019    | Total (10)  | Start of pre-SEA       | 27.3 ± 2.8 | 183.0 ± 8.0 | 73.2 ± 5.2   | 15.5 ± 1.4   | 11.3 ± 1.4   | -            | 61.9 ± 4.4   | - | -           |
| McEwan et al., 2020            | Total (20)  | Start of pre-SEA       | 25.1 ± 4.1 | 177.0 ± 6.9 | 73.75 ± 5.93 | 14.4 ± 2.3   | 10.60 ± 1.88 | -            | 59.58 ± 5.27 | - | -           |
| Kammerer López et al.,<br>2021 | Total (79)  | During competitive SEA | 23.0 ± 4.4 | 178.4 ± 6.8 | 75.2 ± 7.7   | 13.71 ± 3.18 | 10.41 ± 2.71 | 81.60 ± 0.03 | 61.99 ± 6.59 | - | 3.46 ± 0.40 |

SEA=Season
